# Supplementary material for: Loss of Function of Rice Plastidic Glycolate/Glycerate Translocator 1 Impairs Photorespiration and Plant Growth
Source: PubMed Central journal article supplement (PMC6993116; doi:10.3389/fpls.2019.01726), 2020-01-24
Supplement: Image_1.pdf [file Image_1.pdf]

|         |                                                                              |     |
|---------|------------------------------------------------------------------------------|-----|
| AtPLGG1 | MATL—LATP IFSPLASSPARNRLSCSK I RFGSKNGK I LNSDGAQKLNLSKFRKPDGQRF             | 58  |
| OsPLGG1 | MAATSSSSSPCM I ASLRSSHRCRLSPSATATSPPLRLTLPPRRRCRRNPSSSSSSSRQAAA              | 60  |
| OsPLGG2 | -----                                                                        | 0   |
| AtPLGG1 | LQMGSS—KEMNFERKLSVQAMDGAGT-----GNTST I SRNVI A I SHLLVSLG I I LAADYF         | 112 |
| OsPLGG1 | I SMAPANPRHRL I AP I HAAAAAGGGGGGAGATSPSGLPSL—VG I AHLLVSLG I VLASDKF        | 119 |
| OsPLGG2 | --MAVDDLNHHL I A-----VGVGEEAATAHCGLRTLVRNMAQLVVSLG I LVAADKL                 | 49  |
|         | *. . .: * . : ::*:*****::*:*                                                 |     |
| AtPLGG1 | LKQAFVAAS I KFPSALFGMFC I FSVLMI FDSVVPAAANGLMNFEPAPFLF I QRWLPLFYV          | 172 |
| OsPLGG1 | LKQAFVAAAS I KFPSALFGMFCVFSVLVVLDAFAPALAKGFMDFFEPATLF I QRWLPLFYV            | 179 |
| OsPLGG2 | VEQAFVAAAS I KFPSALFAMFCV FALLF---LPPSLANGFMAFFDPATVF I HRWLPLFFV            | 106 |
|         | ::***,*****,,***:***:, . *: **:* **:* **:* **:* **:* **:* **:* **:* **:      |     |
| AtPLGG1 | PSLVVLP LSVRD I PAASGVK I CY I VAGGWLASLCVAGYTA I AVRKMVKTEMTEAEPMAKP        | 232 |
| OsPLGG1 | PSLVVLP LAVRDVPAASGLK I FL I I FGGWFASLMVAGYTALTVRK I VQTQL I PAEPMSKP       | 239 |
| OsPLGG2 | PSLVVLP LAVRDVSPASALK I LF I TFGGWFASLVVAGYTALSRR I VKTQL I PAEPMKRP         | 166 |
|         | *****:***: **,:** * ***:*** *****:***:***:***: ** * **                       |     |
| AtPLGG1 | SPFSTLELWSWSG I FVVSFVGALFYVNSLGTSAARTSLPFLLSSTVLGY I VGSGLPSS I KK          | 292 |
| OsPLGG1 | SPFATLEFWAWGAVFVASFAVAYVNPTALGTTARTCLPFLLASTVLGYMVGSG I PSGVKK               | 299 |
| OsPLGG2 | SPFGPLEFWAWAAVVASFAVAYVSPTALGTTATTCLPFLLASTVFGY I LGSRLPSGVKK                | 226 |
|         | ***, **:*:*,.:**,**, * . *,:***:* *,*****:***:***:*** **,*:**                |     |
| AtPLGG1 | VFHPI I CCALSAVLAALAFGYASGSLDPVLGNYLTKVASDPGAGD I LMGFLGSV I LSFA            | 352 |
| OsPLGG1 | VLHPI I CCALSADLAA I AYGYSRSGVDAVLGDYLTAKPSNPGAGDVLGMFLGSV I I SFA           | 359 |
| OsPLGG2 | VLHPI I CCALSADLAAYGYLSRSGVDAVLGDYLTESPSNPGAGD I LMGFLGSV I I SFA            | 286 |
|         | *:***** **:*:*** * **:* **:*:***: *:*****:*****:***                          |     |
| AtPLGG1 | FSMFKQRKLVKRHAAE I FTSV I VSTVFSLYSTALVGRLVGLLEPSLTVS I LPRC I TVALAL        | 412 |
| OsPLGG1 | FSMFKQRKLVKRHAAE I FTS I A I ASTFSLYSTA I LGRV I GLEPSLT I S I LPRC I TVALAL | 419 |
| OsPLGG2 | FSMFNQRKLVRRHAAE I FTS I AVASTFSLYSTA I LGRVVELEP I LT I S I LPRC I TVALAL   | 346 |
|         | ****:*****:*****: :::,*****:***: ** **:*:*****:*****                         |     |
| AtPLGG1 | S I VSLFEGTNSSLTAAVVVVTGL I GANFVQVVDKLRRLRDP I ARG I ATASSAHGLGTAAL         | 472 |
| OsPLGG1 | S I VSFFEGVNSSLTAAVVVLTGL I GANFVQAAMDKLGNDP I ARG I GTASSAHGLGTAAL          | 479 |
| OsPLGG2 | RVVSLFEGVNTSVTAAVVVLTGL I GANFAQAVMDKLRRLKDP I ARG I GTASSAHGLGTAAV          | 406 |
|         | ::**:*:*,**:*:*****:*****:*,.:*** *,*****,*:*****:*****:                     |     |
| AtPLGG1 | SAKEPEALPFCA I AYALTG I FGSLLCVPAVRQSLLAVVG-----                             | 512 |
| OsPLGG1 | SAKEPEALPFCA I AYGLTG I FGSL I CVPAVRQSLVF I AG-----                         | 519 |
| OsPLGG2 | SAKEPEALPFCA I AYALTGVVASLFCSLPA I RHSLVF I AGDASASQTQHFSY                   | 458 |
|         | *****:*****,,***:.,**:*:***:***:***: :,*                                     |     |

**Supplemental Figure S1.** Protein sequence alignment of AtPLGG1 and rice candidates. Protein sequences of two rice homologs, OsPLGG1 (LOC\_Os01g32830) and OsPLGG2 (LOC\_Os10g42780), were aligned with that of AtPLGG1 (At01g32080). Green color indicates a predicted chloroplast targeting peptide.

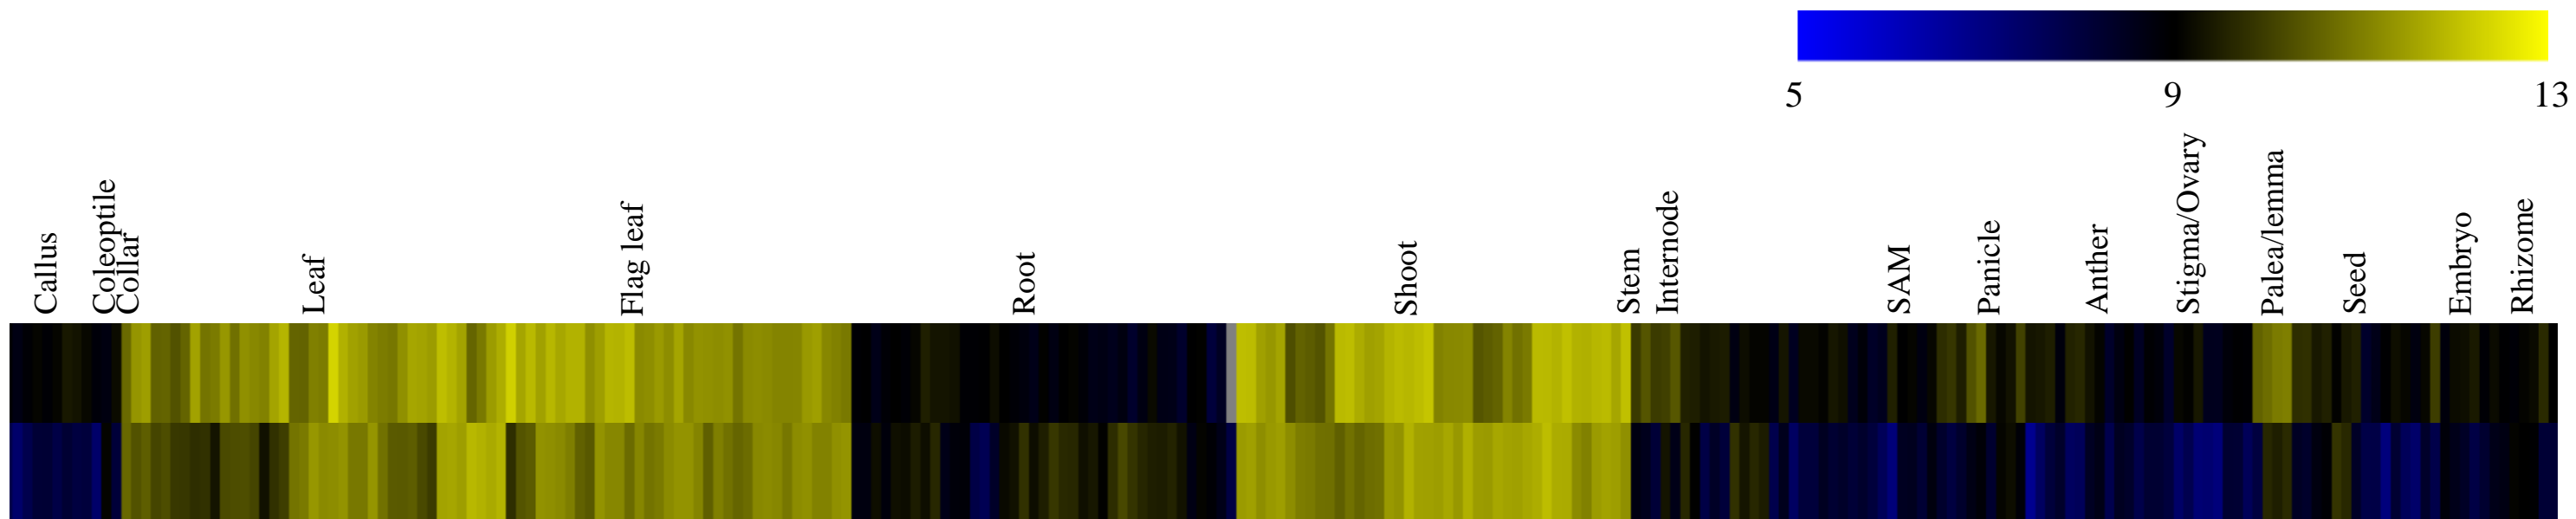

**Supplemental Figure S2.** Heat map expression analysis of OsPLGG1 (top) and OsPLGG2 (bottom) using Affymetrix rice microarray data downloaded from NCBI GEO.

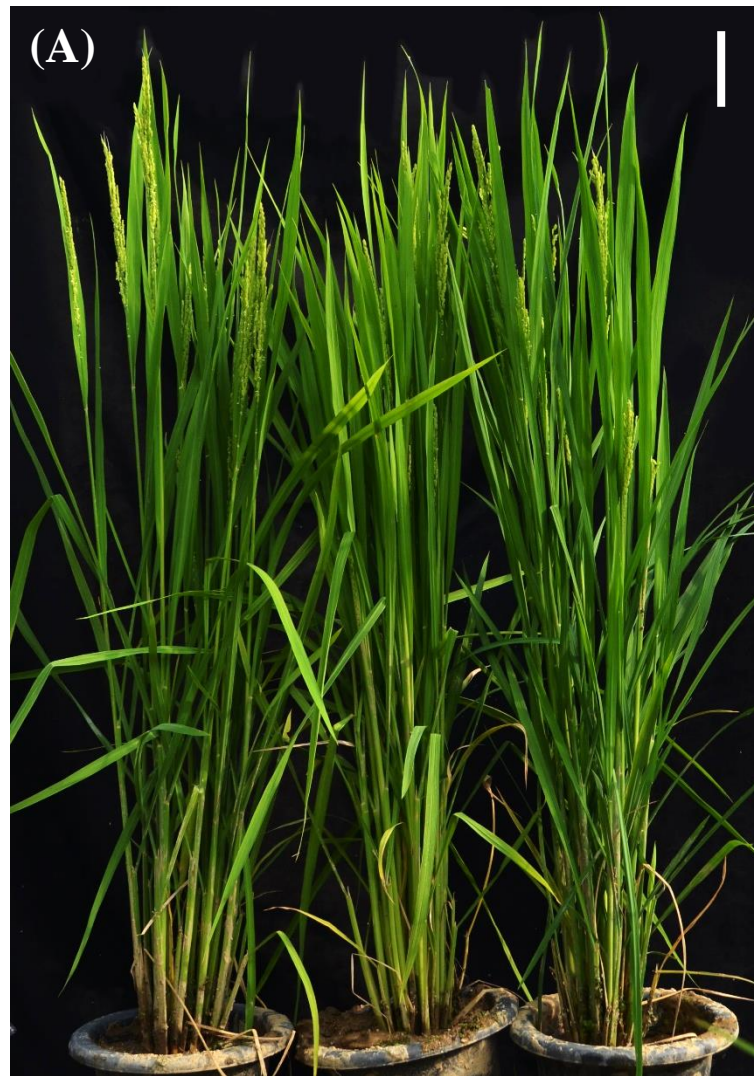

WT *osplgg2-1* *osplgg2-2*

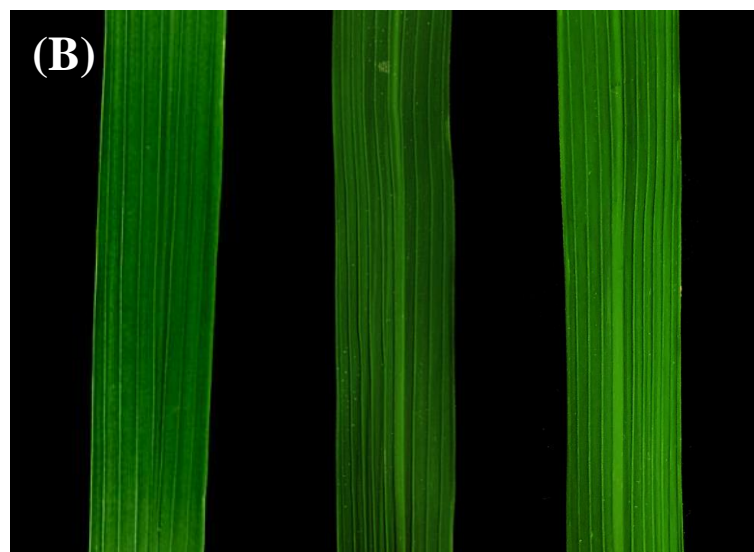

WT *osplgg2-1* *osplgg2-2*

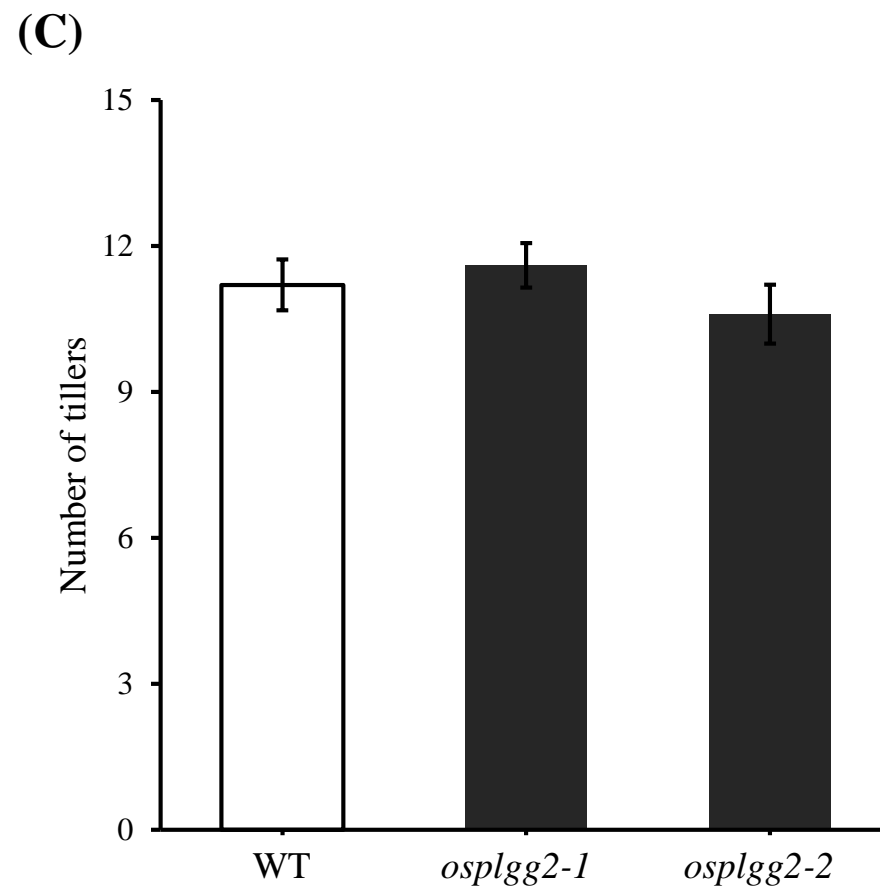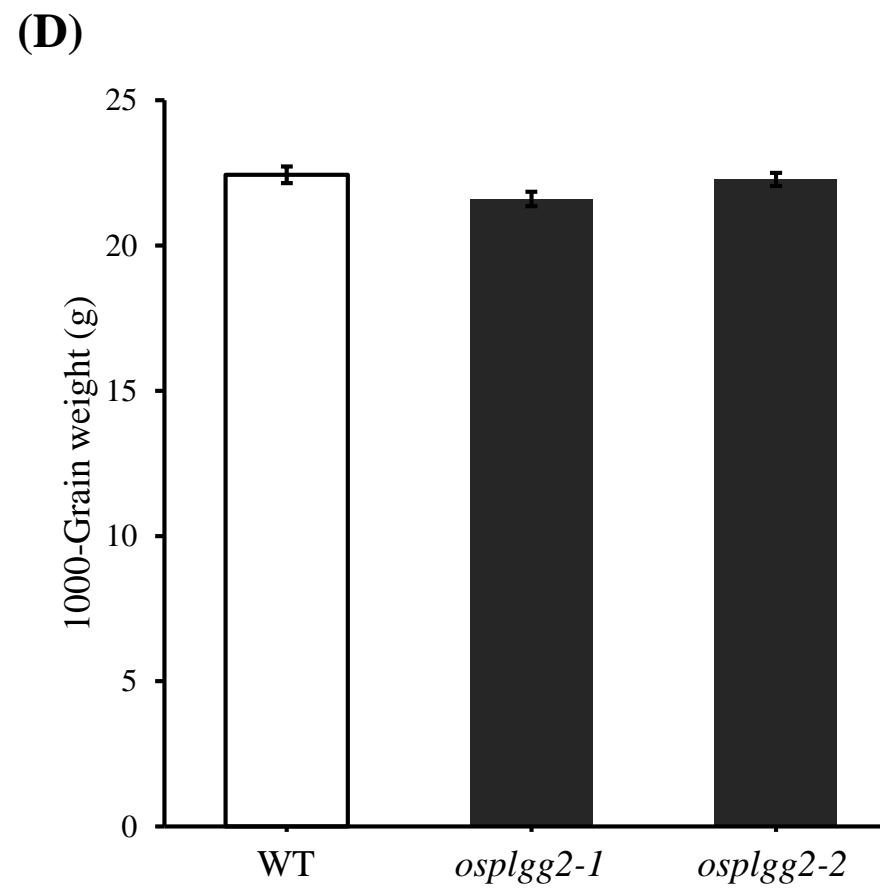

**Supplemental Figure S3.** Phenotypic analysis of *osplgg2* mutants. (A, B) Mature plants (A) and leaf blades (B) of WT, *osplgg2-1* and *osplgg2-2* mutant plants grown for three months in the paddy field. Bar = 10 cm. (C, D) Number of tillers (C) and 1000-grain weight (D) of WT, *osplgg2-1* and *osplgg2-2* plants. The experiment consisted of five independent plants per each line. Error bars indicate SEM.  $P > 0.05$  according to Student's *t*-tests.



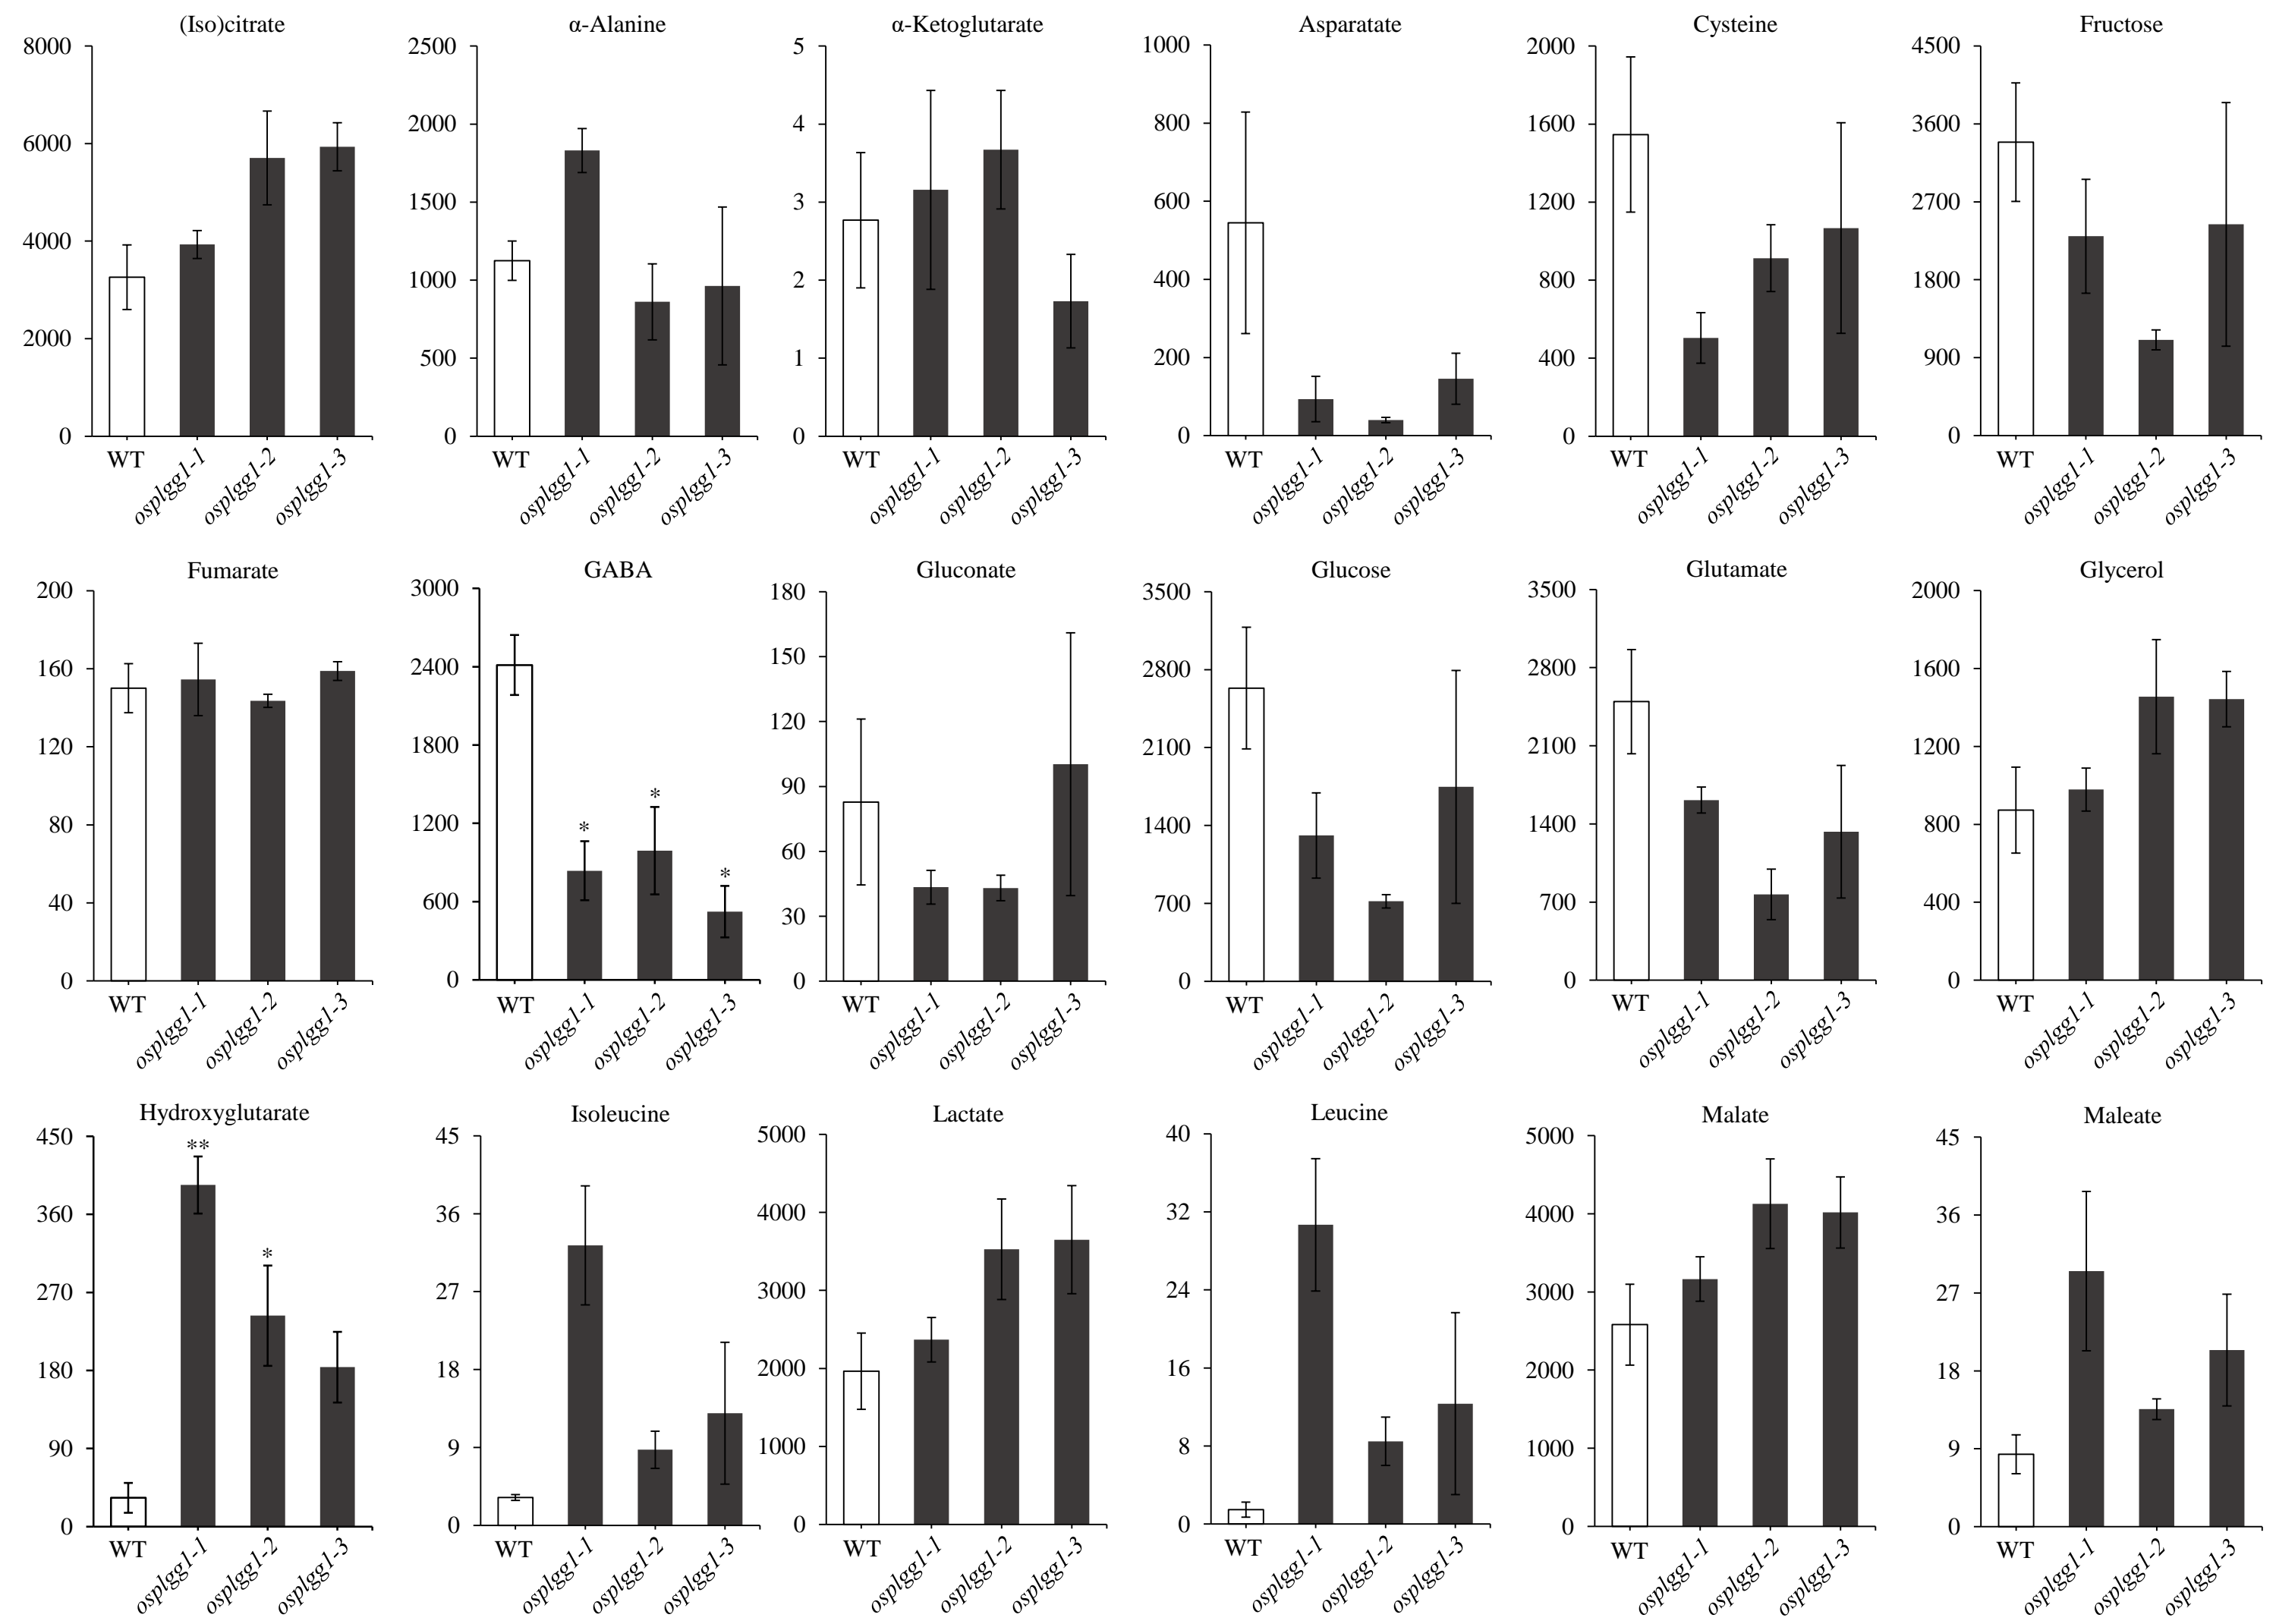

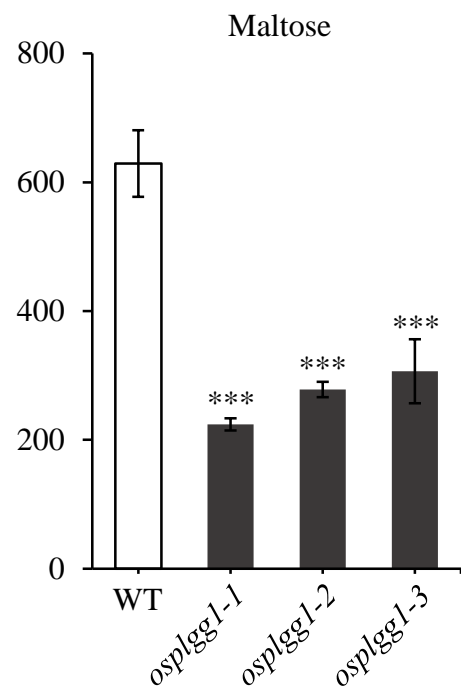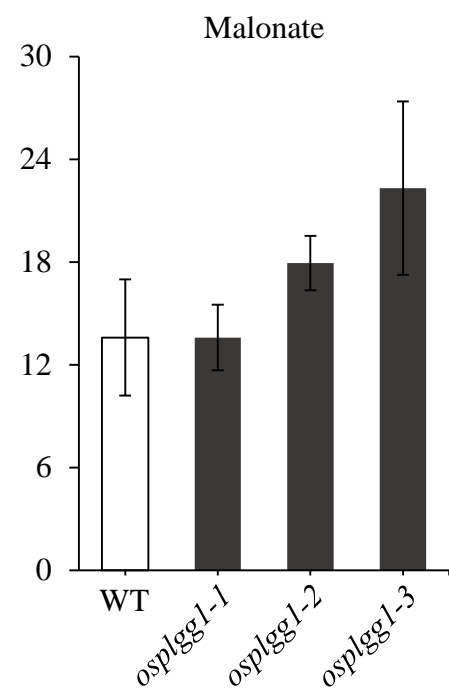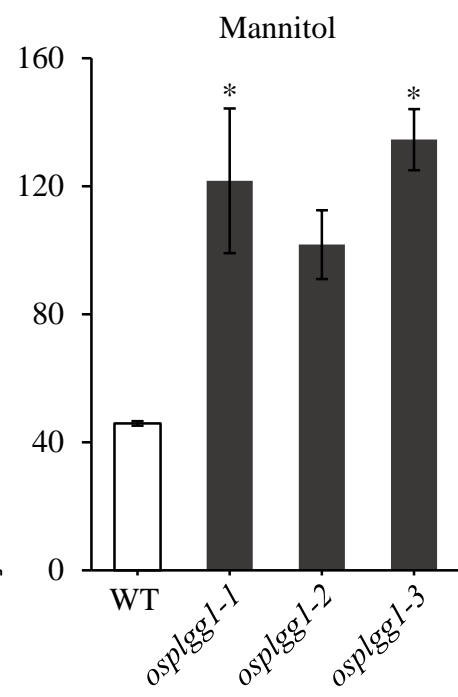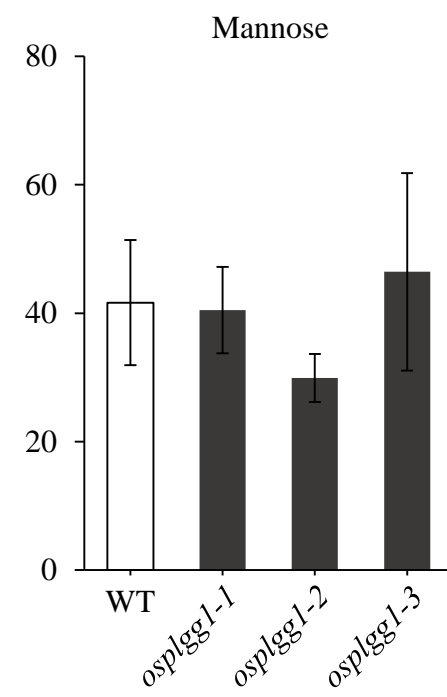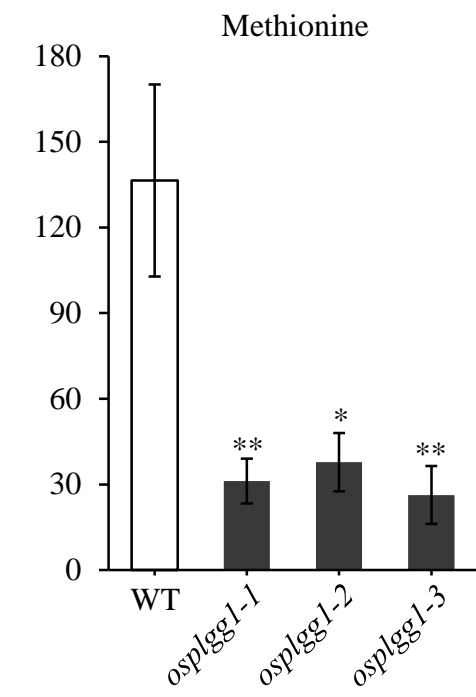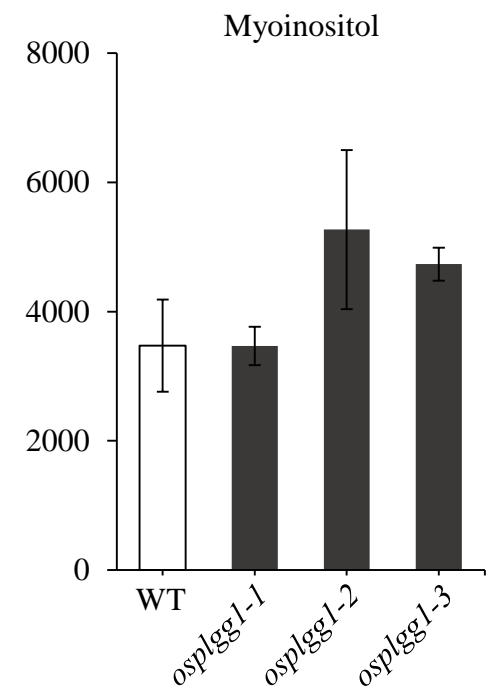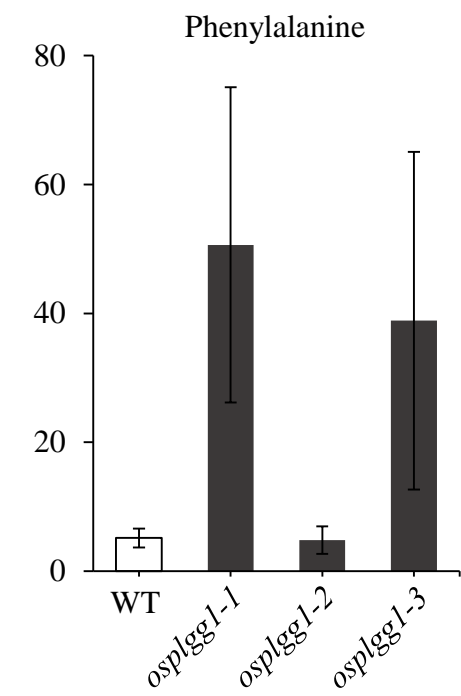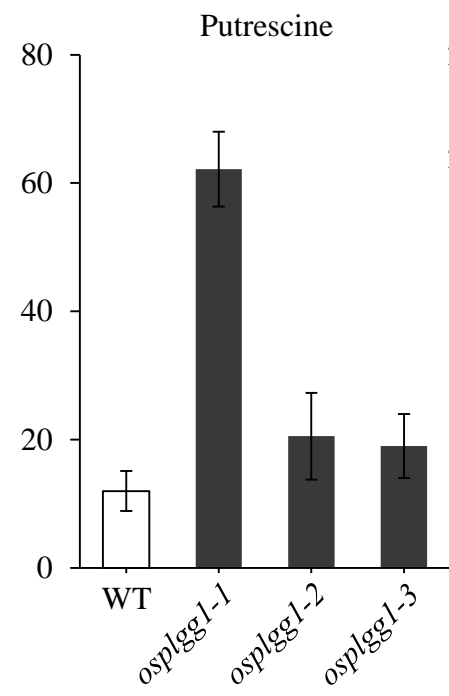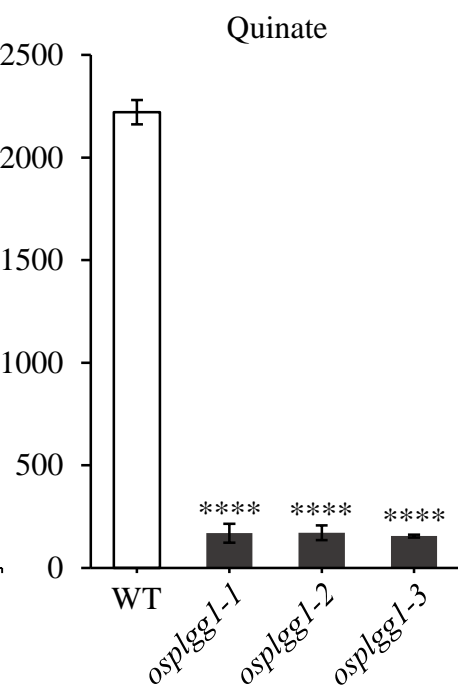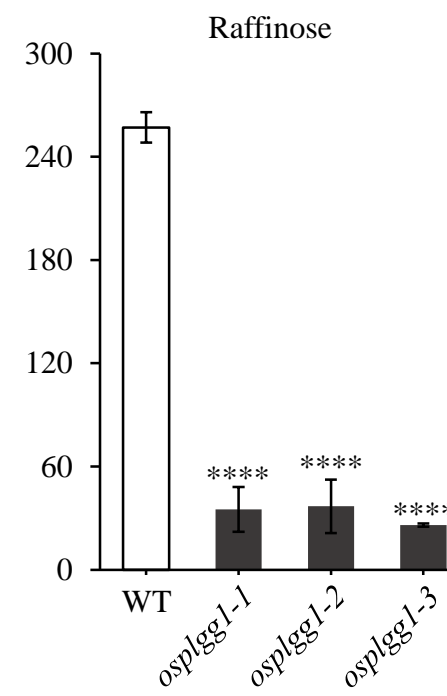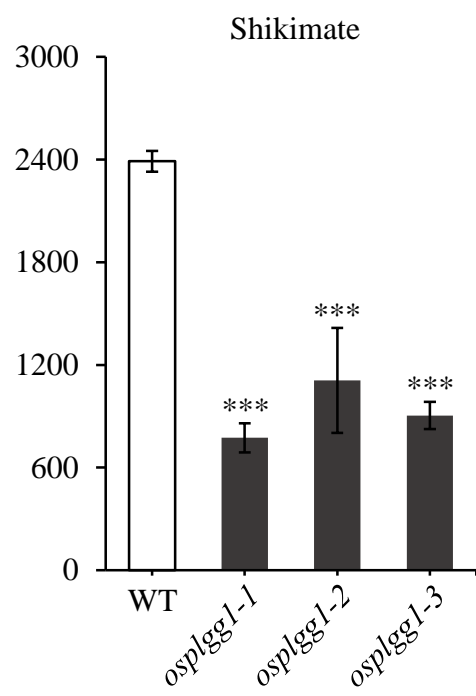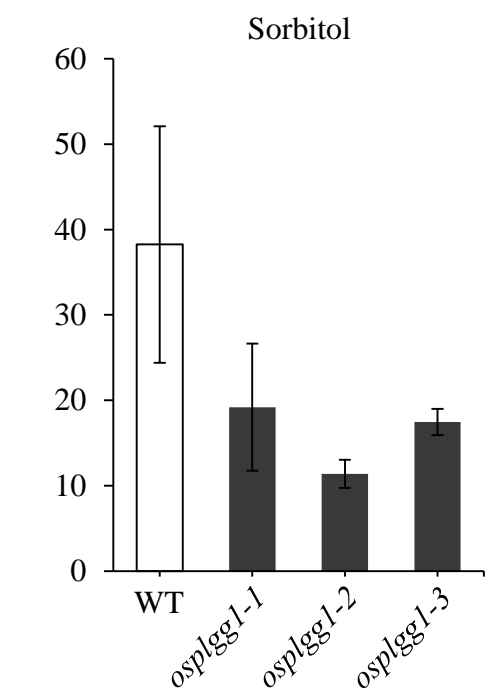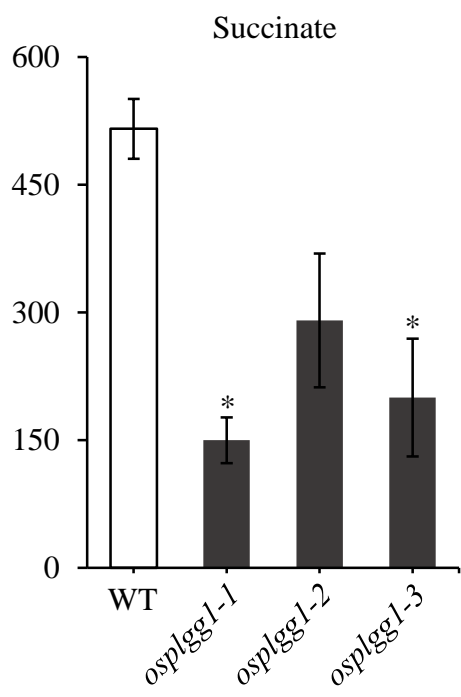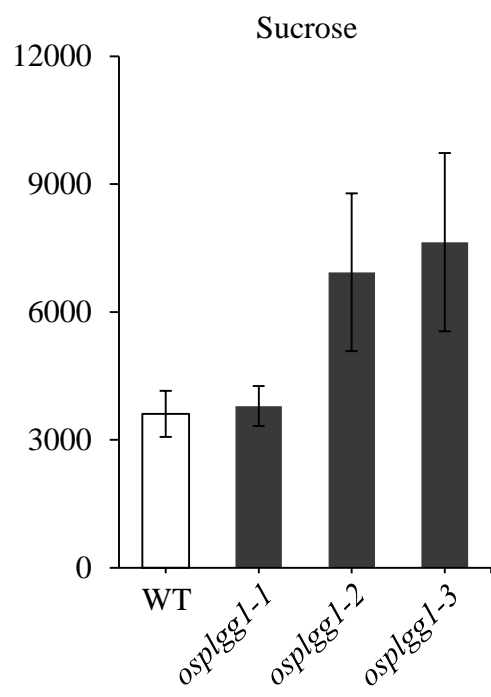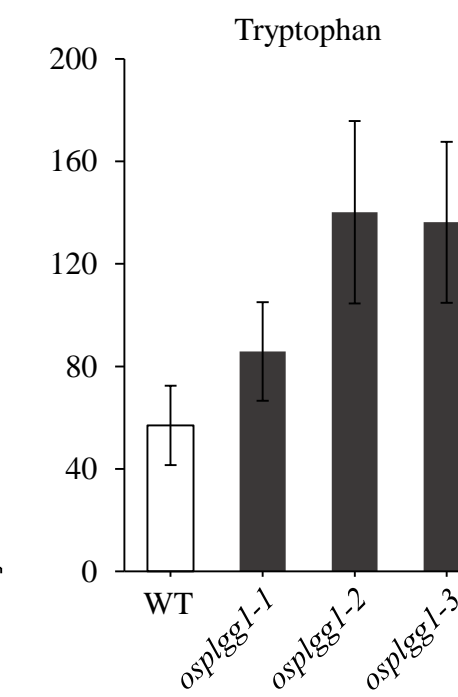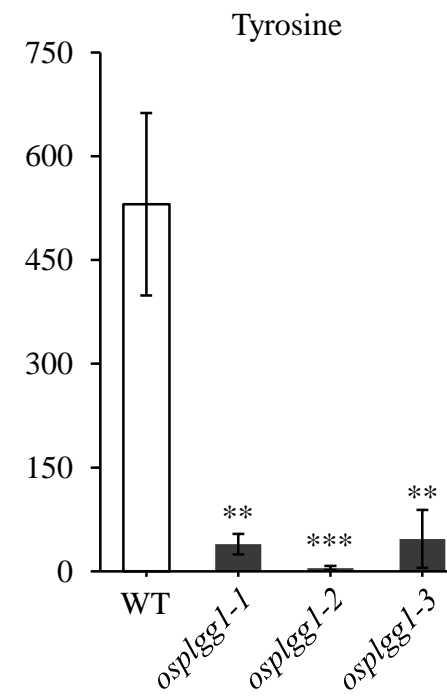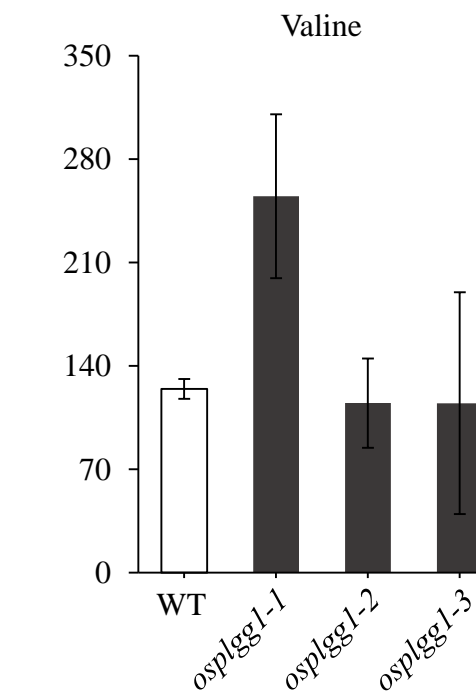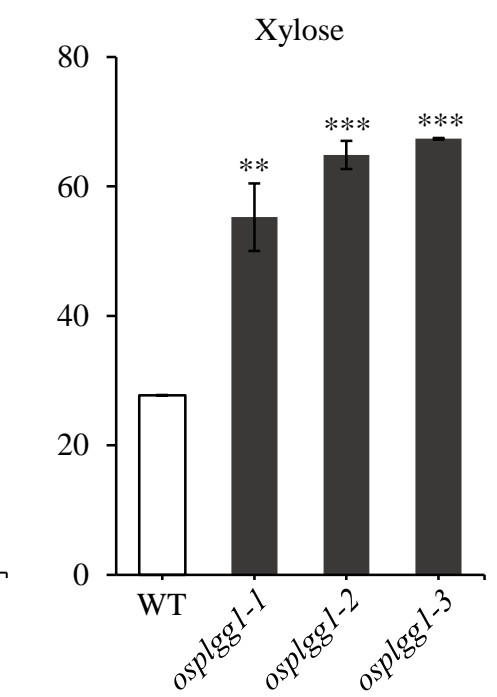

**Supplemental Figure S4.** Relative abundances of metabolites which are not intermediates of photorespiration in leaves of one-month-old WT and *osplgg1* mutant plants grown in the paddy field. The relative metabolite levels were normalized to an internal standard (ribitol) and the fresh weight of the samples. Three independent biological replicates were used in the experiment, each having three technical replicates. Error bars indicate SEM. Student's *t*-test was used to show statistical differences. \*P < 0.05; \*\*P < 0.01; \*\*\*P < 0.001; \*\*\*\*P < 0.0001.
