# Supplementary material for: Loss of Function of Rice Plastidic Glycolate/Glycerate Translocator 1 Impairs Photorespiration and Plant Growth
Source: Front Plant Sci. 2020 Jan 24;10:1726. doi: 10.3389/fpls.2019.01726 (PMC6993116; doi:10.3389/fpls.2019.01726)
Supplement: Supplementary file 1 [file DataSheet_1.xlsx]

## Sheet: Checklist
Supplemental Data Sheet 1. Metabolite data report for the compounds analyzed in this study.
Data are reported in a manner compliant with the standards suggested by Fernie et al. (2011).
Level	Aspect	Information	Fill in
general aspect	Type of metabolome analysis	targeted metabolite analysis	TRUE
		non-targeted metabolite class scale profiling	FALSE
		non-targeted metabolome scale profiling	FALSE
		non-targeted finger printing of mass features	FALSE
	Type of quantification	absolute or quantification	Relative quantification
	Type of reference samples	chemically defined	standard reference compounds aquired in chemical companies
		biologically defined	-
	Type of replication	analytical (same analytical sample preparation)	1
		technological (same biological preparation)	1
		biological (same experimental condition)	3
		full experiment	1 Wild type Control, 3 independent osplgg1 mutant lines
	Type of technology	reference publication	Lisec et al. (2006), Gu et al. (2012)
	Sample preparation		chemically derivatized with methoxyamine hydrochloride and N-Methyl-N-(trimethylsilyl)trifluoroacetamide
		method of chromatography/separation	Lisec et al. (2006), Gu et al. (2012)
		method of ionization	- 70 MeVolt electron impact ionization
		method of detection	time-of-flight
metabolite/mass feature	Metabolite	metabolite name	see worksheet 2
		metabolite sum formula	see worksheet 2
		metabolite structure and public source of metabolite identifier	Metabolites were identified in a standard sample (response check and retention time reference, processed in parallel to the samples) by comparison of spectra to the NIST14 Mass Spectral Library
	Identification	identification process	manually curated with Agilent MassHunter Software (version b06)
		by authentic mass isotopomer added to one or all biological sample(s)	FALSE
		by authentic reference compound within a co-processed reference mixture	FALSE
		by authentic reference compound previously mapped to the analytical system	TRUE
		reference library	Metabolites were identified in a standard sample (response check and retention time reference, processed in parallel to the samples) by comparison of spectra to the NIST14 Mass Spectral Library
		type of mass spectrum
		by match of molecular mass (single mass fragment)	YES
		by match of fragments	YES
		by match of fragmentation pattern	YES
		by match of mass spectrum to reference library	YES
		type of retention index	no RI used
		by match of retention time (index) to reference library	no RI used
	Quantification	type of quantification	relative quantification by internal standard and sample fresh weight
	Validity testing	Recovery testing (chemical analog)	not performed
		Recovery testing (internally added mass isotopomer)	not performed
		Recovery testing (mixture of most divergent samples from the experiment)	not performed
		Test for linear range	not performed
		Limit of quantification (LOQ)	not performed
		Limit of detection (LOD)	not performed

## Sheet: Target Quantification
Metabolite	Quantifier mass (m/z)	Retention time (min)	Analyte Name (Best Hit Derivative)	Synonymes	Formula	MW	ExactMass	CAS#	NIST#	InChIKey
Lactate	117.074	6.12	Lactic Acid, 2TMS derivative	Propanoic acid, 2-[(trimethylsilyl)oxy]-, trimethylsilyl ester | Propionic acid, 2-(trimethylsiloxy)-, trimethylsilyl ester | Bis(trimethylsilyl)lactate | Lactic acid, bis(trimethylsilyl)oxy-, ester | 2-Trimethylsilyloxypropionic acid,trimethylsilyl ester | Trimethylsilyl 2-[(trimethylsilyl)oxy]propanoate | Lactic acid, bis-TMS | Lactic acid, di-TMS | Lactic acid, O,O-TMS	C9H22O3Si2	234	234.110747	17596-96-2	78865	HXRGKEOWDNVHPA-UHFFFAOYSA-N
Glycolate	177.075	6.28	Glycolic acid, 2TMS derivative	Acetic acid, [(trimethylsilyl)oxy]-, trimethylsilyl ester | Acetic acid, (trimethylsiloxy)-, trimethylsilyl ester | Trimethylsilyl (trimethylsilyloxy)acetate | Trimethylsilyl trimethylsiloxyacetate | Glycolic acid, bis-TMS | Glycolic acid, di-TMS | Glycolic acid, (2TMS) | Glycolic acid, trimethylsilyl ether, trimethylsilyl ester	C8H20O3Si2	220	220.095098	33581-77-0	78836	MAEQOWMWOCEXKP-UHFFFAOYSA-N
alpha-Alanine	116.09	6.6	L-Alanine, 2TMS derivative	l-Alanine, N-(trimethylsilyl)-, trimethylsilyl ester | Alanine, N-(trimethylsilyl)-, trimethylsilyl ester, l- | Trimethylsilyl 2-[(trimethylsilyl)amino]propanoate #	C9H23NO2Si2	233	233.126732	27844-07-1	79162	FRWXSKQFKDEAOY-QMMMGPOBSA-N
Hydroxybutyrate	131.09	6.89	2-Hydroxybutyric acid, 2TMS derivative	Butanoic acid, 2-[(trimethylsilyl)oxy]-, trimethylsilyl ester | .alpha.-Hydroxybutyric acid (2TMS) | Trimethylsilyl 2-[(trimethylsilyl)oxy]butanoate # | 2-Hydroxybutyric acid, diTMS | Butanoic acid, 2-hydroxy, bis-TMS | Butyric acid, 2-hydroxy, di-TMS	C10H24O3Si2	248	248.126398	55133-93-2	12070	NSEFDIGCPFOEIV-UHFFFAOYSA-N
Malonate	233.067	7.75	Propanedioic acid, 2TMS derivative	Propanedioic acid, bis(trimethylsilyl) ester | Malonic acid, bis(trimethylsilyl) ester | Malonic acid (bis-TMS) | Bis(trimethylsilyl) malonate | Malonic acid, di(trimethylsilyl) ester | Malonic acid (2TMS) | Malonic acid, bis-TMS | Malonic acid diTMS	C9H20O4Si2	248	248.090013	18457-04-0	78892	ATCKJLDGNXGLAO-UHFFFAOYSA-N
Valine	144.121	7.91	L-Valine, 2TMS derivative	L-Valine, N-(trimethylsilyl)-, trimethylsilyl ester | Valine, N-(trimethylsilyl)-, trimethylsilyl ester, L- | N-(Trimethylsilyl)-L-valine trimethylsilyl ester | N,O-Bis-(trimethylsilyl)valine | Valine, (N,O-TMS) | Valine, di-TMS | Val, di-TMS	C11H27NO2Si2	261	261.158031	7364-44-5	414657	UJMRIWMQZDBOTB-JTQLQIEISA-N
Leucine	158.137	8.54	L-Leucine, 2TMS derivative	L-Leucine, N-(trimethylsilyl)-, trimethylsilyl ester | Leucine, N-(trimethylsilyl)-, trimethylsilyl ester, L- | N,O-Bis(trimethylsilyl)-L-leucine | Trimethylsilyl 4-methyl-2-[(trimethylsilyl)amino]pentanoate # | l-Leucine, N-trimethylsilyl-, trimethylsilyl ester	C12H29NO2Si2	275	275.173683	7364-46-7	333249	OIBARLCQMDCDSG-NSHDSACASA-N
Glycerol	205.108	8.57	Glycerol, 3TMS derivative	Glycerol, tris(trimethylsilyl) ether | Trimethylsilyl ether of glycerol | 3,7-Dioxa-2,8-disilanonane, 2,2,8,8-tetramethyl-5-[(trimethylsilyl)oxy]- | 3,7-Dioxa-2,8-disilanonane, 2,2,8,8-tetramethyl-5-(trimethylsiloxy)- | 2,2,8,8-Tetramethyl-5-[(trimethylsilyl)oxy]-3,7-dioxa-2,8-disilanonane | Glycerol, 1,2,3-tris[(TMS)oxy] | Glycerol, tris-TMS | Glycerol, tris-TMS ether | Glycerol, tri-TMS derivat…	C12H32O3Si3	308	308.165924	6787-10-6	414229	JQUGYGVCECHKBA-UHFFFAOYSA-N
Isoleucine	158.137	8.78	L-Isoleucine, 2TMS derivative	L-Isoleucine, N-(trimethylsilyl)-, trimethylsilyl ester | Isoleucine, N-(trimethylsilyl)-, trimethylsilyl ester, L- | Isoleucine, N-(trimethylsilyl)-, trimethylsilyl ester | Ile, di-TMS | Isoleucine, di-TMS | Isoleucine, bis-TMS | N,O-Bis(trimethylsilyl)isoleucine	C12H29NO2Si2	275	275.173683	7483-92-3	13310	JQJPJSDLFYVVEY-QWRGUYRKSA-N
Proline	142.1	8.83	L-Proline, 2TMS derivative	L-Proline, 1-(trimethylsilyl)-, trimethylsilyl ester | Proline, 1-(trimethylsilyl)-, trimethylsilyl ester, L- | N,O-Bis-(trimethylsilyl)proline | Proline, N,O-TMS | Proline, di-TMS | Pro, di-TMS	C11H25NO2Si2	259	259.142382	7364-47-8	283862	DKGIXVJPGFXLRM-UHFFFAOYSA-N
Maleate	245.07	8.87	2-Butenedioic acid, (Z)-, 2TMS derivative	2-Butenedioic acid (Z)-, bis(trimethylsilyl) ester | Maleic acid, bis(trimethylsilyl) ester | Bis(trimethylsilyl) maleate | Maleic acid, bis-TMS ester | Bis(trimethylsilyl) (2Z)-2-butenedioate | Maleic acid, (2TMS) | Maleic acid, diTMS	C10H20O4Si2	260	260.090012	23508-82-9	78902	OITVFMRNHJZOHF-FPLPWBNLSA-N
Glycine	174.113	8.93	Glycine, 3TMS derivative	Glycine, N,N-bis(trimethylsilyl)-, trimethylsilyl ester | Trimethylsilyl [bis(trimethylsilyl)amino]acetate | GLYCINE (N,N,O-TMS) | Glycine, tris-TMS | Glycine, tri-TMS | Gly, O,N,N-tris-TMS	C11H29NO2Si3	291	291.150608	5630-82-0	153543	YVBMCPFZLGEMJT-UHFFFAOYSA-N
Succinate	247.082	8.95	Butanedioic acid, 2TMS derivative	Butanedioic acid, bis(trimethylsilyl) ester | Succinic acid (2TMS) | Succinic acid, di(trimethylsilyl) ester | Bis(trimethylsilyl) succinate | Butanedioic acid, di-TMS ester | Succinate, bis-TMS | Succinic acid, bis-TMS | Succinic acid, bis(trimethylsilyl) ester | Succinic acid, di-TMS	C10H22O4Si2	262	262.105661	40309-57-7	331692	QUUDZINXVRFXLB-UHFFFAOYSA-N
Glycerate	189.077	9.2	Glyceric acid, 3TMS derivative	Propanoic acid, 2,3-bis[(trimethylsilyl)oxy]-, trimethylsilyl ester | Glyceric acid, tris(trimethylsilyl) deriv. | Trimethylsilyl 2,3-bis[(trimethylsilyl)oxy]propanoate | Glyceric acid, (3TMS) | Glyceric acid, tris-TMS | Glyceric acid, tri-TMS	C12H30O4Si3	322	322.14519	38191-87-6	71911	VTLZEKUPFUIGJQ-UHFFFAOYSA-N
Fumarate	245.067	9.29	2-Butenedioic acid, (E)-, 2TMS derivative	2-Butenedioic acid (E)-, bis(trimethylsilyl) ester | Fumaric acid, bis(trimethylsilyl) ester | Bis(trimethylsilyl) fumarate | Fumaric acid, bis-TMS ester | Bis(trimethylsilyl) (2E)-2-butenedioate | Fumaric acid (2TMS) | Fumaric acid, bis-TMS | Fumaric acid, di-TMS	C10H20O4Si2	260	260.090012	17962-03-7	78901	OITVFMRNHJZOHF-BQYQJAHWSA-N
Serine	204.124	9.52	L-Serine, 3TMS derivative	L-Serine, N,O-bis(trimethylsilyl)-, trimethylsilyl ester | Alanine, 3-(trimethylsiloxy)-N-(trimethylsilyl)-, trimethylsilyl ester, L- | N,O,O-Tris(trimethylsilyl)-L-serine | Tris(trimethylsilyl)-L-serine | Serine, N,O,O-tris(trimethylsilyl)- | Ser, tri-TMS	C12H31NO3Si3	321	321.161173	7364-48-9	71737	MBEDINMZZORSJN-NSHDSACASA-N
Threonine	219.11	9.82	L-Threonine, 3TMS derivative	N,O,O-Tris(trimethylsilyl)-L-threonine | L-Threonine, N,O-bis(trimethylsilyl)-, trimethylsilyl ester | Butyric acid, 3-(trimethylsiloxy)-2-[(trimethylsilyl)amino]-, trimethylsilyl ester | Trimethylsilyl 2-[(trimethylsilyl)amino]-3-[(trimethylsilyl)oxy]butanoate #	C13H33NO3Si3	335	335.176823	7537-02-2	15549	GTYBQDCOPQDAPP-NEPJUHHUSA-N
beta-Alanine	174.113	10.21	.beta.-Alanine, 3TMS derivative	.beta.-Alanine, N,N-bis(trimethylsilyl)-, trimethylsilyl ester | Trimethylsilyl 3-[bis(trimethylsilyl)amino]propanoate # | .beta.-Ala, O,N,N-tris-TMS	C12H31NO2Si3	305	305.16626	55255-77-1	153057	MKLCEJSOJVLNMP-UHFFFAOYSA-N
Malate	233.103	10.84	Malic acid, 3TMS derivative	Butanedioic acid, [(trimethylsilyl)oxy]-, bis(trimethylsilyl) ester | Tris(trimethylsilyl)malic acid | Bis(trimethylsilyl) 2-[(trimethylsilyl)oxy]succinate | Bis(trimethylsilyl) O-(trimethylsilyl)-malate | Malic acid, O-(trimethylsilyl)-, bis(trimethylsilyl)ester | DL-Malic acid, O-trimethylsilyl-, bis(trimethylsilyl) ester | 2-Hydroxybutanedioic acid, (3TMS) | Malic acid (3TMS)	C13H30O5Si3	350	350.140104	38166-11-9	332853	QCOBWZRPFJZHGU-UHFFFAOYSA-N
Methionine	176.093	11.14	L-Methionine, 2TMS derivative	L-Methionine, N-(trimethylsilyl)-, trimethylsilyl ester | Methionine, N-(trimethylsilyl)-, trimethylsilyl ester, L- | N,O-Bis-(trimethylsilyl)methionine | Trimethylsilyl 4-(methylsulfanyl)-2-[(trimethylsilyl)amino]butanoate, (S)- | L-Methionine, N-trimethylsilyl-, trimethylsilyl ester | Methionine, di-TMS | Methionine, (N,O-TMS) | Methionine, bis-TMS | Met, (2TMS)	C11H27NO2SSi2	293	293.130104	27844-10-6	333292	JATQZWJTOMUJCG-JTQLQIEISA-N
Aspartate	232.119	11.16	L-Aspartic acid, 3TMS derivative	L-Aspartic acid, N-(trimethylsilyl)-, bis(trimethylsilyl) ester | Aspartic acid, N-(trimethylsilyl)-, bis(trimethylsilyl) ester | Bis(trimethylsilyl) 2-[(trimethylsilyl)amino]succinate, (L)- # | L-Aspartic acid, N-trimethylsilyl-, bis(trimethylsilyl) ester | Aspartic acid (N,O,O-tris-TMS) | L-Aspartic acid, (3TMS)-	C13H31NO4Si3	349	349.156088	55268-53-6	79170	CTMXPIJTHHSEEF-NSHDSACASA-N
Gaba	174.113	11.24	4-Aminobutanoic acid, 3TMS derivative	Butanoic acid, 4-[bis(trimethylsilyl)amino]-, trimethylsilyl ester | N,N,O-Tris-(trimethylsilyl)-4-aminobutyric acid | Trimethylsilyl 4-[bis(trimethylsilyl)amino]butanoate # | .gamma.-Aminobutyric acid, tri-TMS | Butanoic acid, 4-amino, O,N,N-tris-TMS | GABA 3TMS	C13H33NO2Si3	319	319.18191	39508-23-1	373158	HMZQEGNJWXKANK-UHFFFAOYSA-N
Cysteine	220.1	11.67	L-Cysteine, 3TMS derivative	L-Cysteine, N,S-bis(trimethylsilyl)-, trimethylsilyl ester | Alanine, N-(trimethylsilyl)-3-[(trimethylsilyl)thio]-, trimethylsilyl ester, L- | N,O,S-Tris-(trimethylsilyl)cysteine | Cysteine, (N,O,S-trimethylsilyl)- | Cysteine (N,O,S-TMS) | Cysteine, tri-TMS | Cys, tri-TMS	C12H31NO2SSi3	337	337.13833	7364-50-3	79166	JRLJALOBTPYEJK-NSHDSACASA-N
Hydroxyglutarate	129.07	11.67	Pentanedioic acid, 2-[(trimethylsilyl)oxy]-, bis(trimethylsilyl) ester	2-(Trimethylsiloxy)glutaric acid, bis(trimethylsilyl)- ester | .alpha.-Hydroxyglutaric acid (3TMS) | 2-Hydroxyglutaric acid, O,O,O-tris(trimethylsilyl) deriv. | Bis(trimethylsilyl) 2-[(trimethylsilyl)oxy]pentanedioate # | 2,3-Dideoxypentaric acid, tris-TMS | Pentanedioic acid, 2-[(trimethylsilyl)oxy]-, 1,5-bis(trimethylsilyl) ester | 2-Hydroxyglutaric acid, tris-TMS | 2-Hydroxyglutaric acid, tri-…	C14H32O5Si3	364	364.155754	55530-62-6	30803	GFDIGKRHNMDEJF-UHFFFAOYSA-N
alpha-Ketoglutarate	198.06	11.68	2-Ketoglutaric acid, 2-(ethoxyimino)-, bis(trimethylsilyl) ester	Pentanedioic acid, 2-(ethoxyimino)-, bis(trimethylsilyl) ester	C13H27NO5Si2	333	333.142776		332250	ZCBHCUOIQMWAGG-KAMYIIQDSA-N
Glutamate	246.135	12.1	L-Glutamic acid, 3TMS derivative	Glutamic acid, N-(trimethylsilyl)-, bis(trimethylsilyl) ester, L- | Glutamic acid (3TMS) | L-Glutamic acid, N-(trimethylsilyl)-, bis(trimethylsilyl) ester | Glutamic acid, N,O,O'-tris(trimethylsilyl)-I | N,O,O'-Tris-(trimethylsilyl)glutamic acid | L-Glutamic acid, N-(trimethylsilyl)-, 1,5-bis(trimethylsilyl) ester | L-Glutamic acid, N-trimethylsilyl-, bis(trimethylsilyl) ester | Glutamic acid, N,…	C14H33NO4Si3	363	363.171738	15985-07-6	153388	STTWTJDZFSSNFS-LBPRGKRZSA-N
Phenylalanine	192.12	12.2	Phenylalanine, 2TMS derivative	N,O-Bis-(trimethylsilyl)phenylalanine | DL-Phenylalanine, N-(trimethylsilyl)-, trimethylsilyl ester | Trimethylsilyl 3-phenyl-2-[(trimethylsilyl)amino]propanoate # | Phe, bis-TMS | Phenylalanine, di-TMS | Phenylalanine (N,O-TMS) | Phenylalanine, bis-TMS	C15H27NO2Si2	309	309.158031	2899-52-7	333658	DWNFNBPPSFIIBG-UHFFFAOYSA-N
Asparagine	116.085	12.59	Asparagine, 3TMS derivative	L-Asparagine, N,N2-bis(trimethylsilyl)-, trimethylsilyl ester | Trimethylsilyl 4-oxo-2,4-bis[(trimethylsilyl)amino]butanoate #	C13H32N2O3Si3	348	348.172073	55649-62-2	333260	XENSVLLMVLKHGJ-NSHDSACASA-N
Rhamnose	117.07	13.12	D-(-)-Rhamnose, tetrakis(trimethylsilyl) ether, methyloxime (syn)		C19H47NO5Si4	481	481.25313		380180	SXUVIFIZLGMRBJ-HKWRFOASSA-N
Ribitol	217.108	13.18	Ribitol, 5TMS derivative	Ribitol, 1,2,3,4,5-pentakis-O-(trimethylsilyl)- | 1,2,3,4,5-Pentakis-O-(trimethylsilyl)ribitol | Ribitol, 5TMS | Ribitol, (pentakis-TMS)-	C20H52O5Si5	512	512.266106	32381-53-6	149334	SUZLPERYXSOGNY-UHFFFAOYSA-N
Putrescine	174.113	13.19	Putrescine, 4TMS derivative	1,4-Butanediamine, N,N,N',N'-tetrakis(trimethylsilyl)- | Putrescine tetraTMS | Putrescine tetra-TMS	C16H44N2Si4	376	376.258156	39772-63-9	141288	HALMUIBMTWWREW-UHFFFAOYSA-N
Shikimate	204.1	13.8	Shikimic acid, 4TMS derivative	1-Cyclohexene-1-carboxylic acid, 3,4,5-tris[(trimethylsilyl)oxy]-, trimethylsilyl ester, [3R-(3.alpha.,4.alpha.,5.beta.)]- | 3,4,5-Tris(trimethylsilyloxy)-1-cyclohexanecarboxylicacid,trimethylsilyl ester | 3,4,5-Tris(trimethylsiloxy)-1-cyclohexene-1-carboxylic acid, trimethylsilyl ester | Trimethylsilyl 3,4,5-tris[(trimethylsilyl)oxy]-1-cyclohexene-1-carboxylate #	C19H42O5Si4	462	462.21093	55520-78-0	79703	LMFAUEGOCMAFIW-UHFFFAOYSA-N
Ornithine	174.113	13.89	DL-Ornithine, 4TMS derivative	DL-Ornithine, N,N,N'-tris(trimethylsilyl)-, trimethylsilyl ester	C17H44N2O2Si4	420	420.247984		333139	PUQPCLIKLCAPHV-UHFFFAOYSA-N
Citrate	273.098	13.94	Citric acid, 4TMS derivative	1,2,3-Propanetricarboxylic acid, 2-[(trimethylsilyl)oxy]-, tris(trimethylsilyl) ester | Citric acid, tetrakis(trimethylsilyl) deriv. | Tris(trimethylsilyl) 2-[(trimethylsilyl)oxy]-1,2,3-propanetricarboxylate | Citric acid, trimethylsilyl ether, tris(trimethylsilyl) ester | Citric acid, tetrakis-TMS | Citric acid, tetra-TMS | Citric acid, (4TMS) | Propane-1,2,3-tricarboxylic acid, 2-trimethylsilyl…	C18H40O7Si4	480	480.18511	14330-97-3	333874	VFGAVMGYDWDESE-UHFFFAOYSA-N
Quinate	345.174	14.35	Quininic acid (5TMS)		C22H52O6Si5	552	552.26102		413965	DBCLHKSGLLGXOV-UHFFFAOYSA-N
Fructose	217.108	14.46	D-Fructose, 1,3,4,5,6-pentakis-O-(trimethylsilyl)-, O-methyloxime	d-Glucose,o-methyloxime,pentakis(trimethylsilyl) derivative	C22H55NO6Si5	569	569.28757	56196-14-6	149357	ACDMQGXCXUQPRR-FCDQGJHFSA-N
Mannose	319.158	14.57	d-Mannose, 2,3,4,5,6-pentakis-O-(trimethylsilyl)-, o-methyloxyme, (1E)-		C22H55NO6Si5	569	569.28757	128705-61-3	380332	LLVFXXKDPAPSCJ-HAVVHWLPSA-N
Glucose	205.108	14.68	d-Glucose, 2,3,4,5,6-pentakis-O-(trimethylsilyl)-, o-methyloxyme, (1Z)-		C22H55NO6Si5	569	569.28757	128705-73-7	380329	LLVFXXKDPAPSCJ-QJOMJCCJSA-N
Lysine	156.121	14.73	L-Lysine, 4TMS derivative	L-Lysine, N2,N6,N6-tris(trimethylsilyl)-, trimethylsilyl ester | Tetrakis(trimethylsilyl)lysine | N,N',N',o-Tetra-(trimethylsilyl)lysine | Trimethylsilyl 6-[bis(trimethylsilyl)amino]-2-[(trimethylsilyl)amino]hexanoate #	C18H46N2O2Si4	434	434.263636	55429-07-7	17536	NAMWUGJQNPIVND-KRWDZBQOSA-N
Tyrosine	218.103	14.87	L-Tyrosine, 3TMS derivative	L-Tyrosine, N,O-bis(trimethylsilyl)-, trimethylsilyl ester | Trimethylsilyl 2-[(trimethylsilyl)amino]-3-(4-[(trimethylsilyl)oxy]phenyl)propanoate # | Tyrosine, (3TMS) | Tyrosine, tri-TMS | Tyr, (N,O,O-TMS)	C18H35NO3Si3	397	397.192474	51220-73-6	79269	WMWBCQXPKSQMOK-KRWDZBQOSA-N
Mannitol	205.108	14.95	D-Mannitol, 6TMS derivative	D-Mannitol, 1,2,3,4,5,6-hexakis-O-(trimethylsilyl)- | Mannitol, hexakis-O-(trimethylsilyl)-, D- | 1,2,3,4,5,6-Hexakis-O-(trimethylsilyl)mannitol-, (D)- | D-Mannitol, hexakis-TMS | Mannitol, (6TMS)-	C24H62O6Si6	614	614.3162	14317-07-8	380338	USBJDBWAPKNPCK-UHFFFAOYSA-N
Sorbitol	205.108	15.01	D-Sorbitol, 6TMS derivative	D-Sorbitol, hexakis(trimethylsilyl) ether	C24H62O6Si6	614	614.3162		380145	USBJDBWAPKNPCK-UHFFFAOYSA-N
Galactitol	217.108	15.04	Galactitol, 6TMS derivative	Galactitol, 1,2,3,4,5,6-hexakis-O-(trimethylsilyl)- | 1,2,3,4,5,6-Hexakis-O-(trimethylsilyl)galactitol | Dulcitol, (6TMS) | Dulcitol, hexakis(trimethylsilyl) ether | Galacitol, hexacis-TMS | Galactitol (6TMS) | Galactitol, hexaTMS | Galactitol, hexacis-TMS ether | Galactitol, hexakis-O-(trimethylsilyl)-	C24H62O6Si6	614	614.3162	18919-39-6	18534	USBJDBWAPKNPCK-UHFFFAOYSA-N
Gluconate	333.138	15.52	D-Gluconic acid, 6TMS derivative	D-Gluconic acid, 2,3,4,5,6-pentakis-O-(trimethylsilyl)-, trimethylsilyl ester | Gluconic acid, 2,3,4,5,6-pentakis-O-(trimethylsilyl)-, trimethylsilyl ester, D- | Trimethylsilyl 2,3,4,5,6-pentakis-O-(trimethylsilyl)gluconate, D- | Gluconic acid, (6TMS) | Gluconic acid, hexakis-TMS	C24H60O7Si6	628	628.295464	34290-52-3	99903	IVIMVRAMMWQMHJ-UHFFFAOYSA-N
Myoinositol	305.142	16.17	Myo-Inositol, 6TMS derivative	myo-Inositol, 1,2,3,4,5,6-hexakis-O-(trimethylsilyl)- | Inositol, 1,2,3,4,5,6-hexakis-O-(trimethylsilyl)-, myo- | Trimethyl((2,3,4,5,6-pentakis[(trimethylsilyl)oxy]cyclohexyl)oxy)silane # | myo-Inositol (6TMS) | mio-Inositol, hexakis-TMS | Myoinositol TMS	C24H60O6Si6	612	612.30055	2582-79-8	380339	FRTKXRNTVMCAKI-UHFFFAOYSA-N
Tryptophan	202.105	16.9	L-Tryptophan, N(1)-(trimethylsilyl)-, trimethylsilyl ester	L-Tryptophan, 2TMS derivative | Tryptophan, bis(trimethylsilyl)- | N,1-Bis(trimethylsilyl)tryptophan # | Tryptophan, di-TMS | Try, N,O-(bis-TMS)-	C17H28N2O2Si2	348	348.168932	61445-27-0	79179	OROPXBPBFRVMLJ-UHFFFAOYSA-N
Spermidine	144.121	17.24	Spermine, 6TMS derivative	Spermine per-TMS II	C28H74N4Si6	634	634.452908	65898-82-0	141253	ZUXHWAFGTWWCDT-UHFFFAOYSA-N
Sucrose	361.169	19.9	Sucrose, 8TMS derivative	.alpha.-D-Glucopyranoside, 1,3,4,6-tetrakis-O-(trimethylsilyl)-.beta.-D-fructofuranosyl 2,3,4,6-tetrakis-O-(trimethylsilyl)- | Sucrose, octakis-O-(trimethylsilyl)- | Octa-O-(trimethylsilyl)sucrose	C36H86O11Si8	918	918.432426	19159-25-2	380091	JDAONBLATRVCRV-QZTQCLTNSA-N
Lactose	204.1	20.23	D-Lactose, octakis(trimethylsilyl) ether, methyloxime (isomer 1)		C37H89NO11Si8	947	947.458977		380103	KNAZTEWBFRPMHZ-HBAMXUDRSA-N
Maltose	361.169	20.54	Maltose, octakis(trimethylsilyl) ether, methyloxime (isomer 1)		C37H89NO11Si8	947	947.458977		380101	KNAZTEWBFRPMHZ-DZTJYMNTSA-N
